# Supplementary material for: Uncertainty of atmospheric microwave absorption model: impact on ground-based radiometer simulations and retrievals
Source: Copernicus journal article supplement (doi:10.5194/acp-2018-536), 2018-07-11
Supplement: Supplementary file [file acp-2018-536-AC2-supplement.pdf]

## Referee Comment 2 (RC2) by Anonymous Referee #2

The paper is scientifically sound and well written. I recommend publication. I only have a very minor suggestion: Please consider adding the citation: Wentz, F., and T. Meissner, Atmospheric Absorption Model for Dry Air and Water Vapor at Microwave Frequencies below 100 GHz Derived from Spaceborne Radiometer Observations, *Radio Sci.*, 51, doi:10.1002/2015RS005858, 2016. in the context of the water vapor continuum. The satellite results on the vapor continuum seem to match the ground observation by Turner et al. 2010 pretty well.

We thank the reviewer for the positive feedback.

Two more references have been added to the revised manuscript, together with the following sentence (Section A.1):

“The results of Turner et al. (2009) seem also supported by independent investigations based on satellite observations in the 10.7 to 89 GHz range (Wentz and Meissner, 2016) and around the 183 GHz line (Bobryshev et al., 2018).”
